# Supplementary material for: Mitochondrial Abnormalities in Induced Pluripotent Stem Cells-Derived Motor Neurons from Patients with Riboflavin Transporter Deficiency
Source: MDPI journal article supplement (doi:10.3390/antiox9121252), 2020-12-09
Supplement: s1 [file s1]

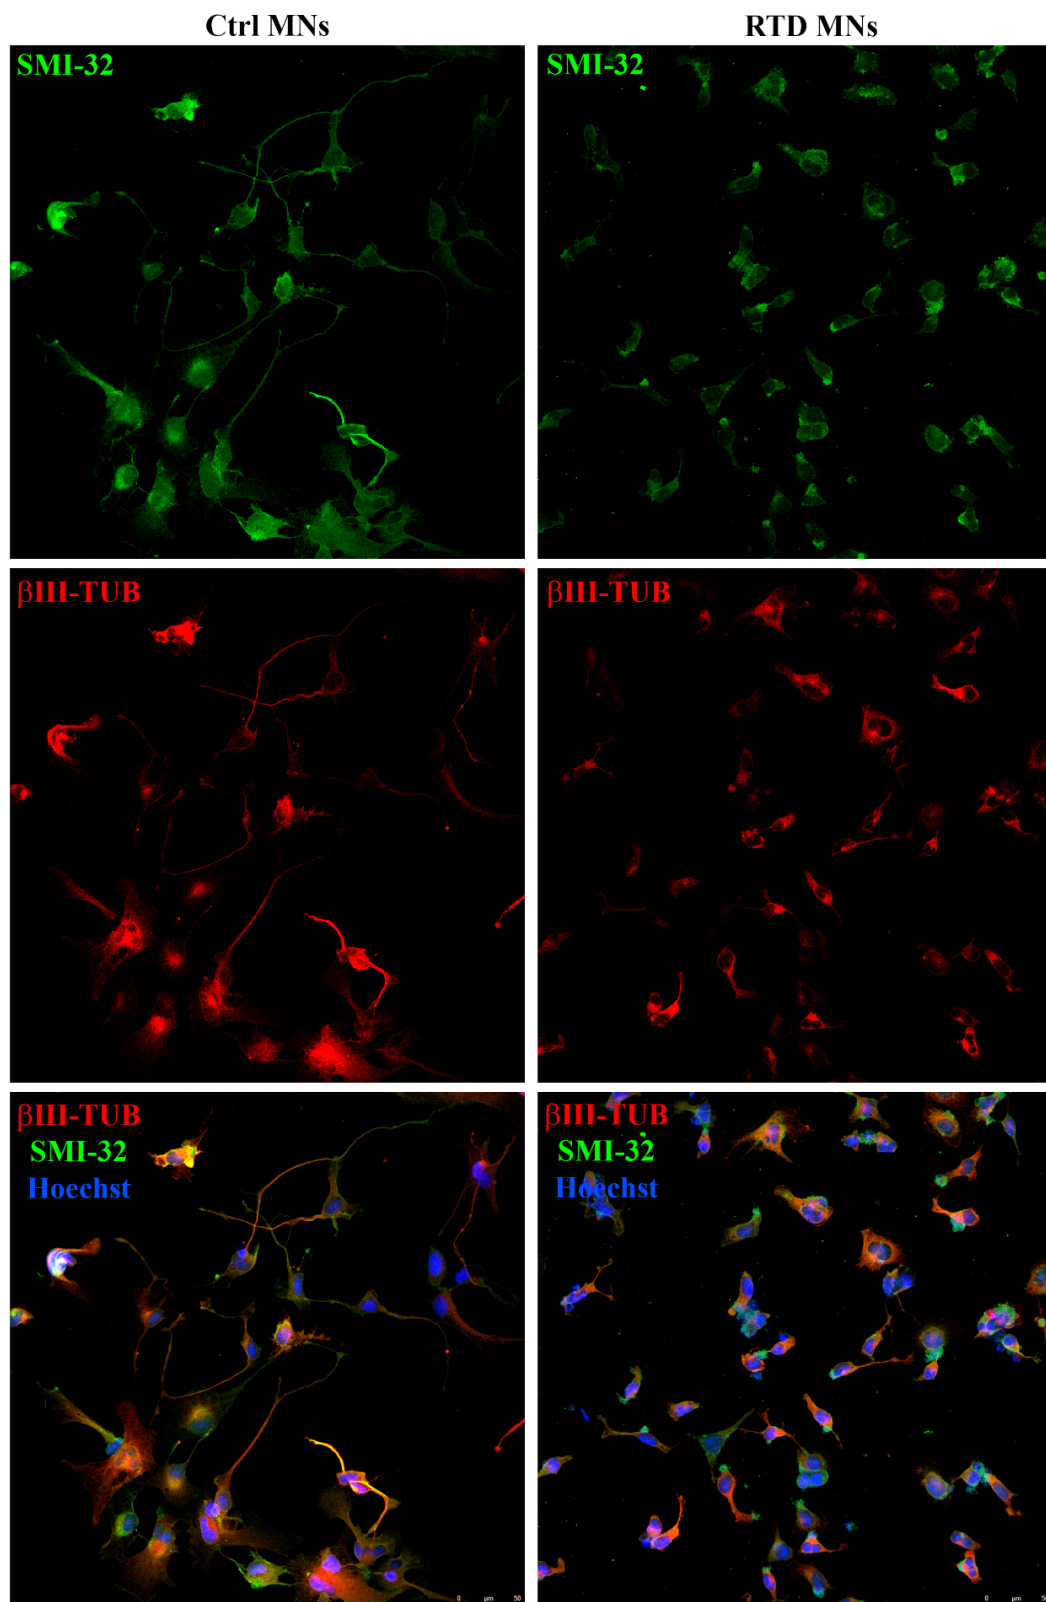

**Figure S1.** Confocal analysis after immunofluorescence using SMI-32 (green) and  $\beta$ III-TUB (red) antibodies showing aberrant neuronal morphology of RTD MNs, with respect to Ctrl MNs. Both markers show a patchy distribution in RTD cells, as opposed to the filamentous appearance in healthy neurons. Nuclei are stained with Hoechst (blue).
